# Supplementary material
Source: publisher site journal article supplement (https://www.dovepress.com/article/434579)
Supplement: Supplementary file 1 [file get_supplementary_file.php]

**Table S1 Primer sequences for qRT-PCR**

| Gene | 5′–3′ forward | 5′–3′ forward |
| --- | --- | --- |
| *GAPDH* | ACCACAGTCCATGCCATCAC | ACCACCCTGTTGCTGTA |
| *IL-6* | ATAACCACCCCTGACCCAAC | CCCATGCTACATTTGCCGAA |
| *IL-8* | TCAGAGACAGCAGAGCACAC | CCCATGCTACATTTGCCGAA |
| *CCL2* | CAGCCAGATGCAATCAATGCC | GGCAAAACTGCACCTTCACA |
| *SOD2* | GGGATTGATGTGTGGGAGCA | CATAAAGAGCTTAACATACTCAGCA |

**Table S2 Primer sequences for qRT-PCR**

| Gene | 5′–3′ forward | 5′–3′ forward |
| --- | --- | --- |
| GAPDH | TCTCTGCTCCTCCCTGTTCT | ATCCGTTCACACCGACCTTC |
| IL-6  IL-1β | TTTCTCTCCGCAAGAGACTTCC  GGGATGATGACGACCTGCTA | TGTGGGTGGTATCCTCTGTGA  ACAGCACGAGGCATTTTTGT |


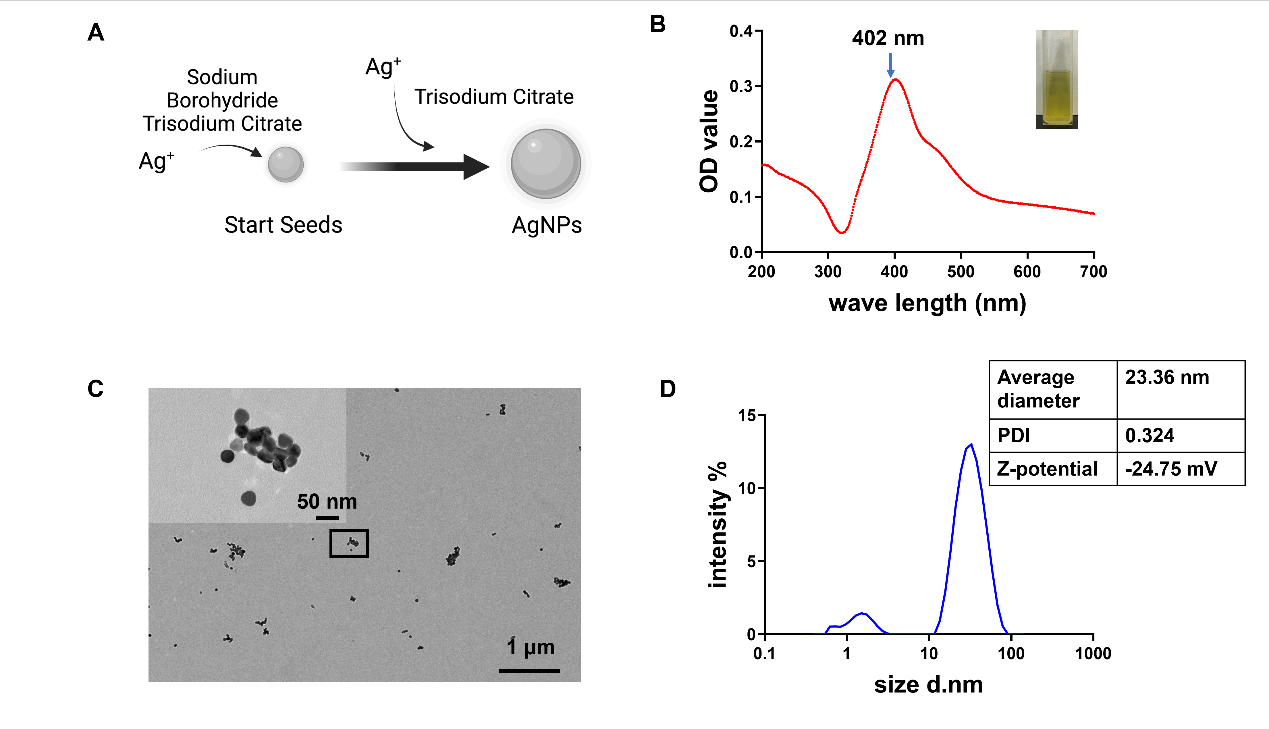


**Figure S1**Characterization of AgNPs.(**A**) The schematic diagram of the AgNPs fabrication procedure, created with BioRender.com; (**B**)UV-vis spectrum of AgNPs; Inset, photography of the AgNPs in colloid solution; (**C**) The TEM images of AgNPs;(**D**) Particle size distribution and zeta potential of the synthesized AgNPs.


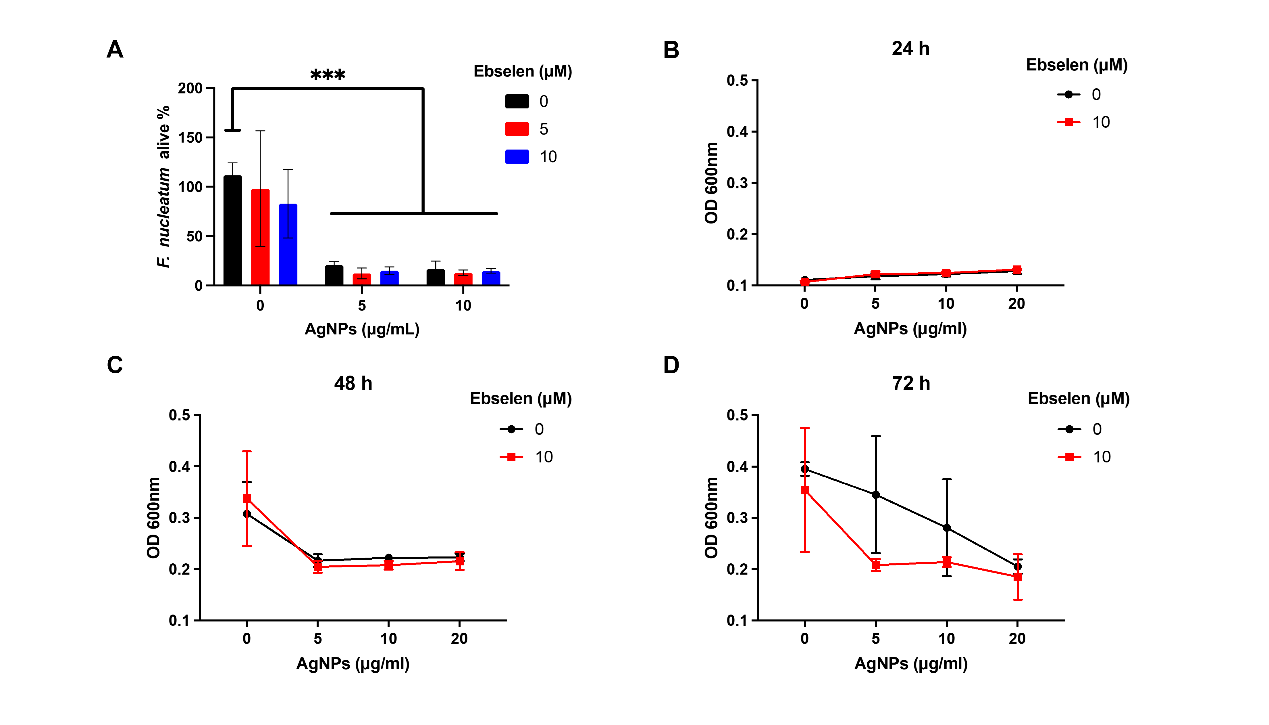


**Figure S2** Antibacterial effect of AgNPs and ebselen on planktonic *F. nucleatum*.(**A**) CFU counting results of live bacteria after treatment with various concentrations of AgNPs and ebselen for 24 h; (**B-D**) Inhibitory effect of AgNPs and ebselen on *F. nucleatum* growth after treatment for 24, 48, and 72 h, respectively. Data were presented as the mean ± SD, ****P* < 0.001.


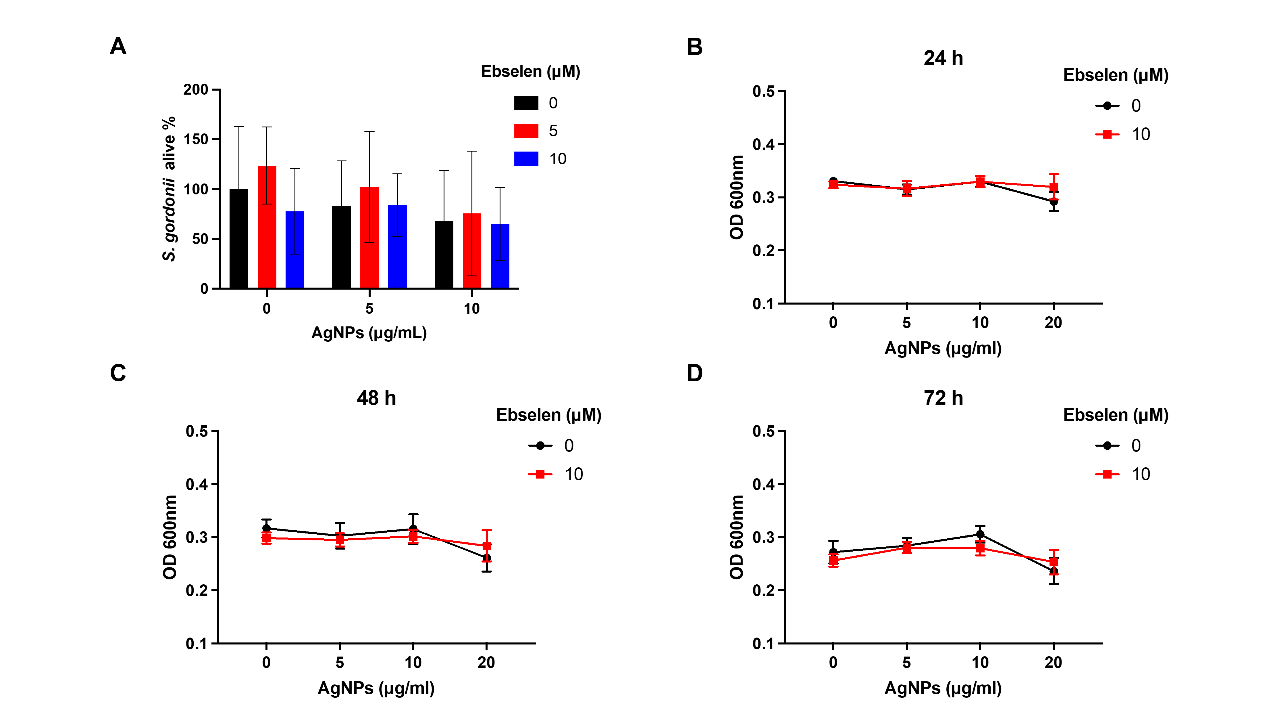


**Figure S3** Antibacterial effect of AgNPs and ebselen on planktonic *S. gordonii*. (**A**) CFU counting results of live bacteria after treatment with various concentrations of AgNPs and ebselen for 24 h; (**B-D**) Inhibitory effect of AgNPs and ebselen on *S. gordonii* growth after treatment for 24, 48, and 72 h, respectively. Data were presented as the mean ± SD.


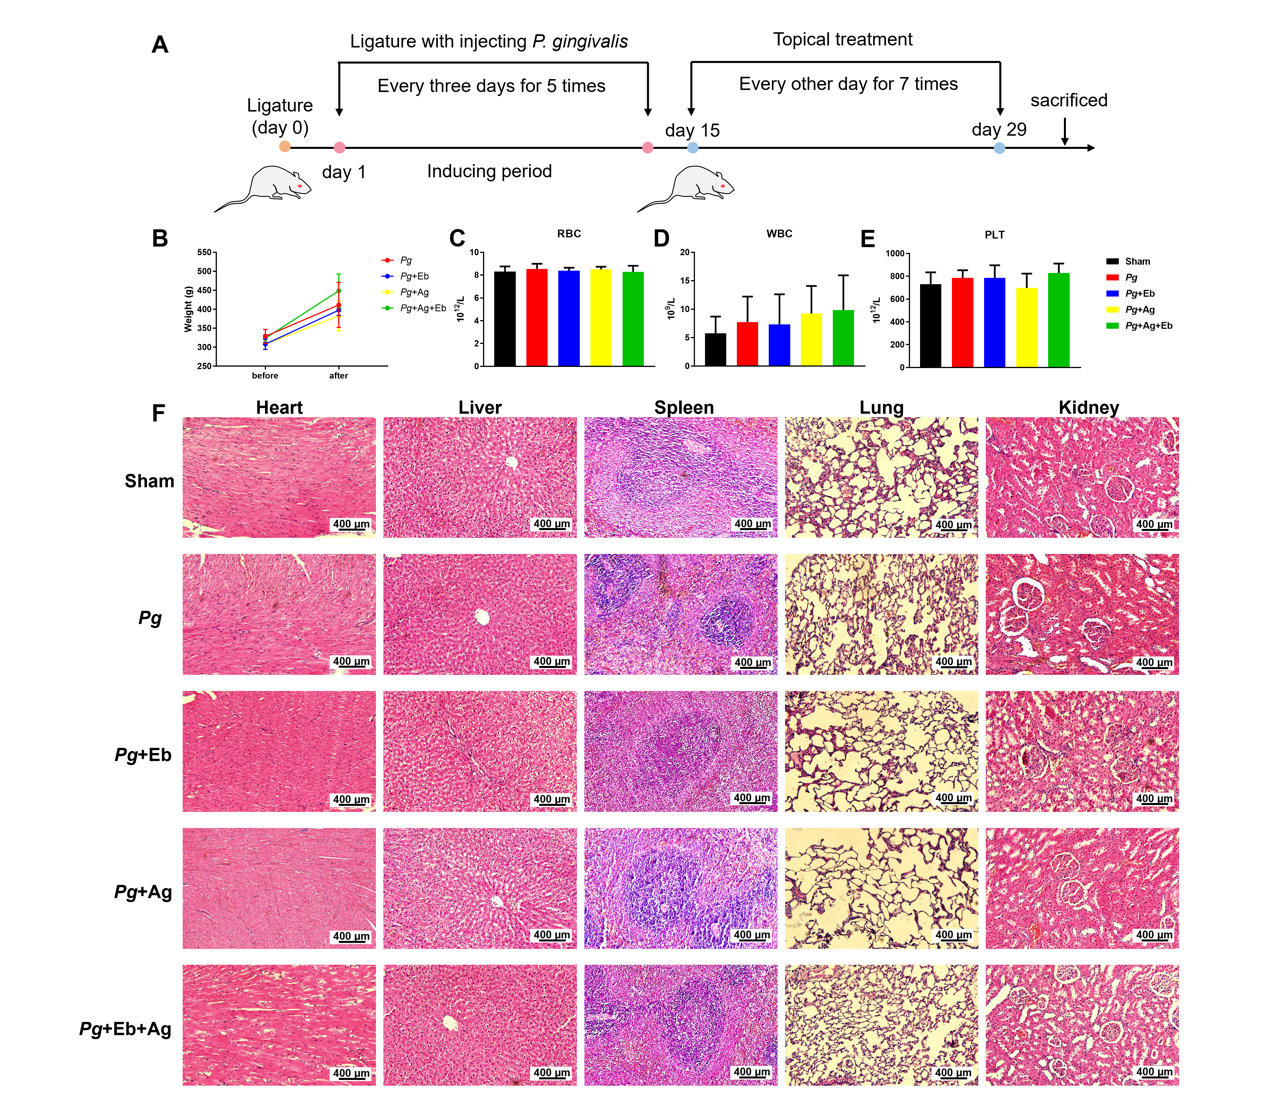


**Figure S4** The biocompatibility of AgNPs and ebselen *in vivo*. (**A**) The construction of experimental periodontitis and the timeline of *in vivo* experiment; (**B**) The weight of experimental rats during the experimental procedure; (**C-E**) RBCs, WBCs, and PLTs in blood routine examination; (**F**)Histopathological images of the heart, liver, spleen, lung, and kidney. Data were presented as the mean ± SD.
